# Supplementary material for: ncreasing Ages of Inga punctata Tree Soils Facilitate Greater Fungal Community Abundance and Successional Development, and Efficiency of Microbial Organic Carbon Utilization
Source: Preprints.org preprint supplement (doi:10.20944/preprints202408.1606.v1), 2024-08-22
Supplement: Supplementary file 1 [file supplementary]

**Table S1.** Articles used to help identify fungal genera with the capacity to degrade complex organic C and/or act as wood rot fungi, found within the soils from *Inga punctata* trees planted 4, 8, and 11 years before sampling, Old Inga trees (> 50 years old) and an adjacent pasture within a restoration area in Monteverde, Costa Rica.

Abdel-Azeem AM, Gherbawy YA, Sabry AM (2016a) Enzyme profiles and genotyping of

Chaetomium globosum isolates from various substrates. Plant Biosystems 150(3):420–428

Abdel-Azeem AM, Abu-Elsaoud AM, Abo Nahas HH, Abdel-Azeem MA, Balbool BA, Mousa MK, Ali NH, Darwish AMG. 2021. Biodiversity and industrial applications of genus *Chaetomium*. In: Industrially Important Fungi for Sustainable Development, Volume 1: Biodiversity and Ecological Perspectives. Springer International Publishing, Cham. DOI: 10.1007/978-3-030-67561-5_5.

Alimadadi, N., Soudi, M. R., Wang, S.An, QiWang, M., Talebpour, Z., and Yan Bai, F. (2016). Starmerella orientalis f.a., sp. Nov., an ascomycetous yeast species isolated from flowers. Int. J. Syst. Evol. Microbiol. 66 (3), 1476–1481. doi:10.1099/ijsem.0.000905

Aliyu, H.; Gorte, O.; Neumann, A.; Ochsenreither, K. Global Transcriptome Profile of the Oleaginous Yeast Saitozyma podzolica DSM 27192 Cultivated in Glucose and Xylose. J. Fungi 2021, 7, 758. https:// doi.org/10.3390/jof7090758

Bilański P, Grad B, Kowalski T (2022) Pyrenochaeta fraxinina as colonizer of ash and sycamore petioles, its morphology, ecology, and phylogenetic connections. Mycological Progress 21(9):74. <https://doi.org/10.1007/s11557-022-01827-8>

Čadež N., Drumonde-Neves J., Sipiczki M., Dlauchy D., Lima T., et al. (2020). *Starmerella vitis* fa, sp. nov., a yeast species isolated from flowers and grapes. *Antonie Leeuwenhoek.*2020;113:1289–1298. doi: 10.1007/s10482-020-01438-x

Cai L, Jeewon R, Hyde KD (2006b) Phylogenetic investigations of Sordariaceae based on multiple gene sequences and morphology. Mycol Res 110(2):137–150

Dix, NJ and Webster, J 1995, Fungal Ecology, Chapman and Hall, UK 556pages DOI 10.1007/978-94-011-0693-1

Gonçalves, P., Gonçalves, C., Brito, P. H., & Sampaio, J. P. (2020). The Wickerhamiella/Starmerella clade-A treasure trove for the study of the evolution of yeast metabolism. *Yeast (Chichester, England)*, *37*(4), 313–320. https://doi.org/10.1002/yea.3463

Gong Z, Wang Q, Shen H, Hu C, Jin G, Zhao ZK: Co-fermentation of cellobiose and xylose by *Lipomyces starkeyi* for lipid production. Bioresour Technol 2012, 117:20–24.

Holland, H.L. (1997) Investigation of the Carbon- and Sulfur-Oxidizing Capabilities of Microorganisms by Active-Site Modeling, Editor(s): Saul L. Neidleman, Allen I. Laskin, Advances in Applied Microbiology, Academic Press, Volume 44, Pages 125-165, ISSN 0065-2164,

ISBN 9780120026449, https://doi.org/10.1016/S0065-2164(08)70461-1.

Kedves, O., Kocsubé, S., Bata, T., Andersson, M. A., Salo, J. M., *et al.* (2021). *Chaetomium* and chaetomium-like species from European indoor environments include *Dichotomopilus finlandicus* sp. nov. Pathogens, 10(9), Article 1133. <https://doi.org/10.3390/pathogens10091133>

Ladevèze, S., Haon, M., Villares, A. [Cathala](https://link.springer.com/article/10.1186/s13068-017-0903-0#auth-Bernard-Cathala-Aff2),  B., [Grisel](https://link.springer.com/article/10.1186/s13068-017-0903-0#auth-Sacha-Grisel-Aff1), S. (2017).  The yeast *Geotrichum candidum* encodes functional lytic polysaccharide monooxygenases. *Biotechnol Biofuels* **10**, 215 (2017). https://doi.org/10.1186/s13068-017-0903-0

Mandyam K, Jumpponen A (2005) Seeking the elusive function of the root-colonising dark septate endophytic fungi. Stud Mycol 53:173–189. https:// doi. org/ 10. 3114/ sim. 53.1. 173

Matos, I. T. S. R.; Cassa-Barbosa, L. A.; Costa-Neto, P. Q.; Astolfi-Filho, S. (2012) Cultivation of

*Trichosporon mycotoxinivorans* in sugarcane bagasse hemicellulosic hydrolyzate. Electronic Journal of

Biotechnology. Val Paraiso, v. 15, n. 1, p. 12-18, Jan. 2012.

Menkis, A., Urbina, H., James, T. Y., & Rosling, A. (2014). Archaeorhizomyces borealis sp. nov. and a sequence-based classification of related soil fungal species. *Fungal biology*, *118*(12), 943–955. <https://doi.org/10.1016/j.funbio.2014.08.005>

Molnar, O., Schatzmayr, G., Fuchs, E., & Prillinger, H. (2004). Trichosporon mycotoxinivorans sp. nov., a new yeast species useful in biological detoxification of various mycotoxins. *Systematic and applied microbiology*, *27*(6), 661–671. <https://doi.org/10.1078/0723202042369947>

Ozimek, E., Hanaka, A. (2021) Mortierella Species as the PlantGrowth-Promoting Fungi Present in

the Agricultural Soils. Agriculture, 11, 7. https://dx.doi.org/10.3390/

agriculture11010007

Rodriguez, R.J., White Jr, J.F., Arnold, A.E. and Redman, R.S. (2009), Fungal endophytes: diversity and functional roles. New Phytologist, 182: 314-330. <https://doi.org/10.1111/j.1469-8137.2009.02773.x>

Rosling, A., Cox, F., Cruz-Martinez, K., Ihrmark, K., Grelet, G.-A., Lindahl, B. D., Menkis, A., & James, T. Y. (2011). Archaeorhizomycetes: Unearthing an Ancient Class of Ubiquitous Soil Fungi. *Science*, *333*(6044), 876-879. <https://doi.org/10.1126/science.1206958>

Saleha Parveen, Muhammad Ishtiaq Ali, Maryam Aslam, Irfan Ali, Asif Jamal, Mysoon M. Al-Ansari, Latifah Al-Humaid, Michael Urynowicz, Zaixing Huang,Optimizing biocatalytic potential of Dipodascus australiensis M-2 for degrading lignin under laboratory conditions. Microbiological Research, Volume 265, 2022,127179, ISSN 0944-5013, <https://doi.org/10.1016/j.micres.2022.127179>.

Schlegel, M., Münsterkötter, M., Güldener, U., [Bruggmann](https://bmcgenomics.biomedcentral.com/articles/10.1186/s12864-016-3369-8#auth-R_my-Bruggmann-Aff4), R., [Duò](https://bmcgenomics.biomedcentral.com/articles/10.1186/s12864-016-3369-8#auth-Angelo-Du_-Aff1), *et al.* Globally distributed root endophyte *Phialocephala subalpina* links pathogenic and saprophytic lifestyles. *BMC Genomics* **17**, 1015 (2016). <https://doi.org/10.1186/s12864-016-3369-8>

Spet ˇ ´ık, M., Berraf-Tebbal, A., Pokluda, R., and Eichmeier, A. 2021. Pyrenochaetopsis kuksensis (Pyrenochaetopsidaceae), a new species associated with an ornamental boxwood in the Czech Republic. Phytotaxa 498:177‐185.

Vekiru E, Hametner C, Mitterbauer R, Rechthaler J, Adam G, Schatzmayr G,

et al. Cleavage of zearalenone by *Trichosporon mycotoxinivorans* to a novel

nonestrogenic metabolite. Appl Environ Microbiol. 2010;76:2353–9.

Wang, HM.D., Cheng, YS., Huang, CH., [Chia-Wei Huang](https://link.springer.com/article/10.1007/s12010-016-2130-8#auth-Chia_Wei-Huang-Aff2)  Optimization of High Solids Dilute Acid Hydrolysis of Spent Coffee Ground at Mild Temperature for Enzymatic Saccharification and Microbial Oil Fermentation. *Appl Biochem Biotechnol* **180**, 753–765 (2016). <https://doi.org/10.1007/s12010-016-2130-8>

Weiss, M., Bauer, R, Sampaio, J.P., Oberwinkler, F. (2014) Systematics and Evolution (McLaughlin and Spatafora, eds.) The mycota VII Part A. Springer-Verlag, Berlin, 331-355. Doi. 10.1007/978-3-642-55318-9_12
